# Supplementary material
Source: MDPI journal article supplement (https://www.mdpi.com/1424-8247/15/10/1178)

# Cationic Perylene Antivirals with Aqueous Solubility for Studies in vivo

## Supplementary materials

**Anna A. Shtro**<sup>1,†,\*</sup>, **Anzhelika V. Garshinina**<sup>1,†</sup>, **Vera A. Alferova**<sup>2,3,†</sup>, **Polina N. Kamzeeva**<sup>2</sup>,  
**Viktor P. Volok**<sup>2,4</sup>, **Ekaterina S. Kolpakova**<sup>4</sup>, **Timofei D. Nikitin**<sup>2</sup>, **Alexey A. Chistov**<sup>2</sup>,  
**Evgeny S. Belyaev**<sup>5</sup>, **Vladimir A. Korshun**<sup>2</sup>, **Liubov I. Kozlovskaya**<sup>4,6,\*</sup> and **Andrey V. Aralov**<sup>2,\*</sup>

<sup>1</sup> Smorodintsev Research Institute of Influenza, Saint Petersburg, 197376, Russia

<sup>2</sup> Shemyakin-Ovchinnikov Institute of Bioorganic Chemistry, Russian Academy of Sciences, Moscow, 117997, Russia

<sup>3</sup> Gause Institute of New Antibiotics, Moscow, 119021, Russia

<sup>4</sup> Chumakov Scientific Center for Research and Development of Immune-and-Biological Products (Institute of poliomyelitis), Russian Academy of Sciences, Moscow, 108819, Russia

<sup>5</sup> Frumkin Institute of Physical Chemistry and Electrochemistry, Russian Academy of Science, Moscow, 119071, Russia

<sup>6</sup> Institute of Translational Medicine and Biotechnology, Sechenov Moscow State Medical University, Moscow, 119991, Russia

\* Correspondence: aashtro@gmail.com (A.A.S.); lubov\_i\_k@mail.ru (L.I.K.); baruh238@mail.ru (AVA)

† These authors contributed equally to this work.

## CONTENTS

|                                                                                          |    |
|------------------------------------------------------------------------------------------|----|
| Figure S1. $^1\text{H}$ and $^{13}\text{C}$ NMR spectra of the compound <b>2a</b> . .... | 3  |
| Figure S2. $^1\text{H}$ and $^{13}\text{C}$ NMR spectra of the compound <b>2b</b> . .... | 4  |
| Figure S3. $^1\text{H}$ and $^{13}\text{C}$ NMR spectra of the compound <b>3a</b> . .... | 5  |
| Figure S4. $^1\text{H}$ and $^{13}\text{C}$ NMR spectra of the compound <b>3b</b> . .... | 6  |
| Figure S5. $^1\text{H}$ and $^{13}\text{C}$ NMR spectra of the compound <b>5</b> . ....  | 7  |
| Figure S6. $^1\text{H}$ and $^{13}\text{C}$ NMR spectra of the compound <b>6</b> . ....  | 8  |
| Figure S7. $^1\text{H}$ and $^{13}\text{C}$ NMR spectra of the compound <b>7</b> . ....  | 9  |
| Figure S8. $^1\text{H}$ and $^{13}\text{C}$ NMR spectra of the compound <b>8</b> . ....  | 10 |
| Figure S9. $^1\text{H}$ and $^{13}\text{C}$ NMR spectra of the compound <b>10</b> . .... | 11 |
| Table S1. Predicted ADMET profiles of the synthesized compounds. ....                    | 12 |
| Figure S10. Serum stability evaluation. ....                                             | 14 |
| Figure S11. HPLC trace for compound <b>3a</b> ....                                       | 15 |
| Figure S12. HPLC trace for compound <b>3b</b> ....                                       | 16 |
| Figure S13. HPLC trace for compound <b>8</b> ....                                        | 17 |
| Figure S14. HPLC trace for compound <b>10</b> ....                                       | 18 |

Figure S1.  $^1\text{H}$  and  $^{13}\text{C}$  NMR spectra of the compound **2a**.

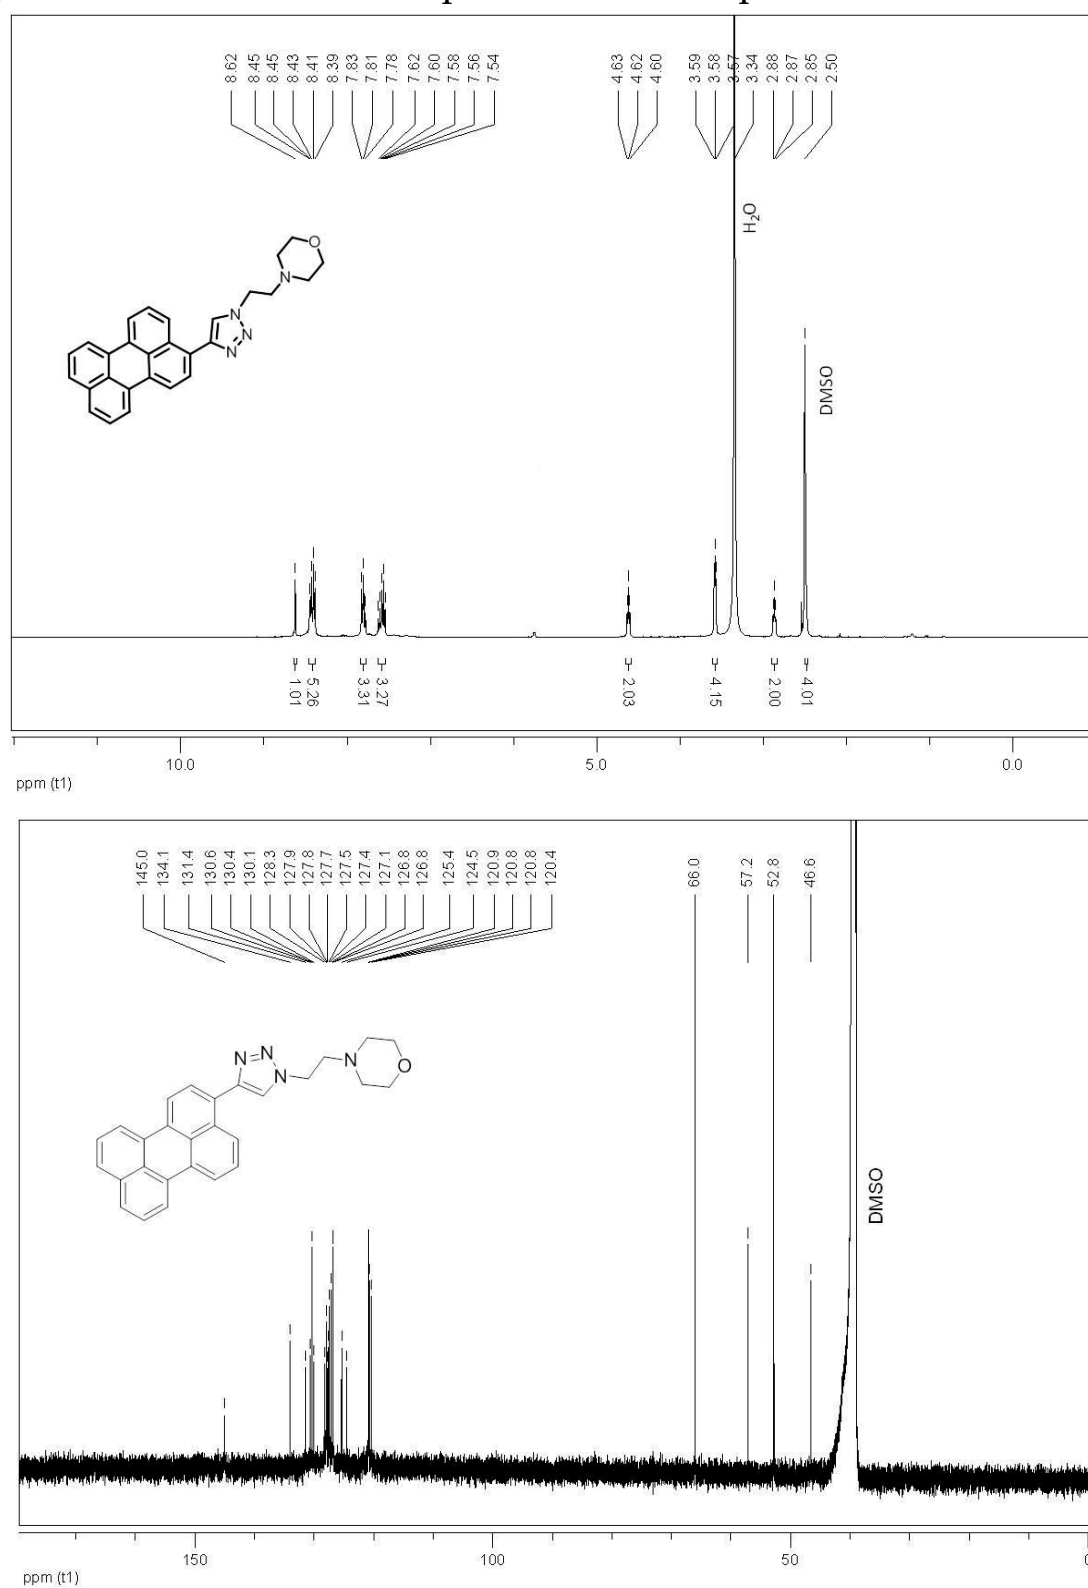

Figure S2.  $^1\text{H}$  and  $^{13}\text{C}$  NMR spectra of the compound **2b**.

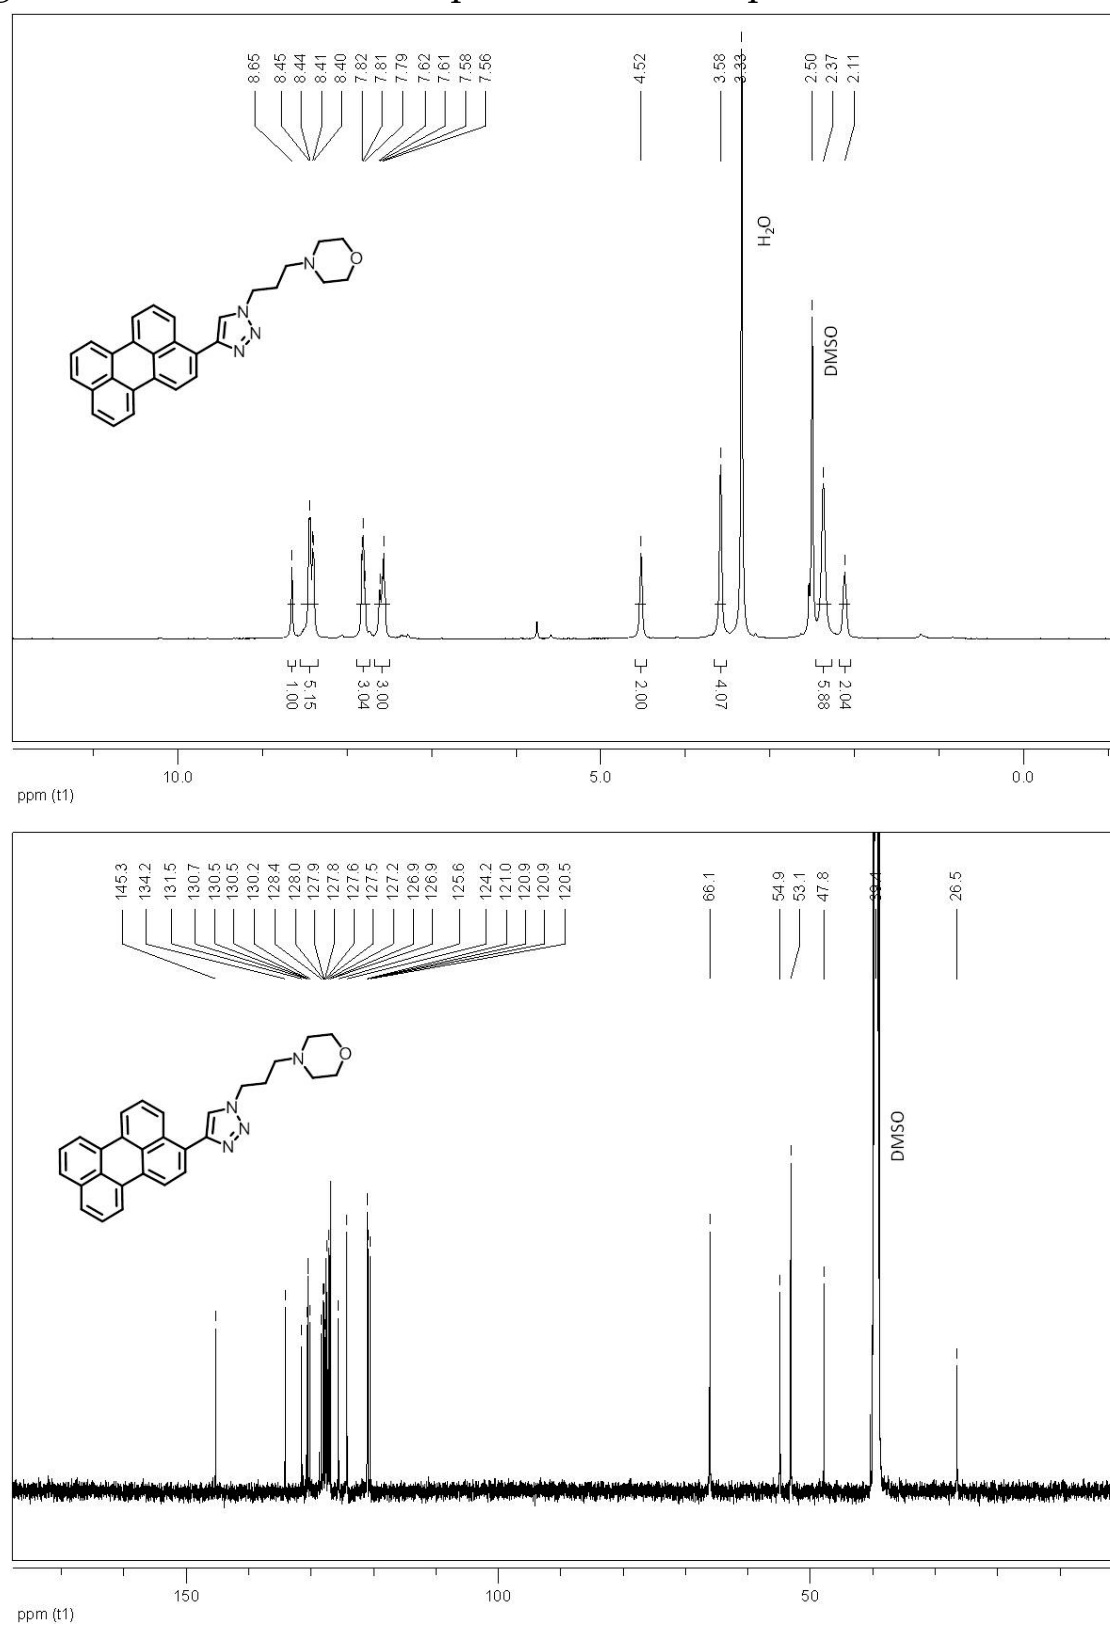

Figure S3.  $^1\text{H}$  and  $^{13}\text{C}$  NMR spectra of the compound **3a**.

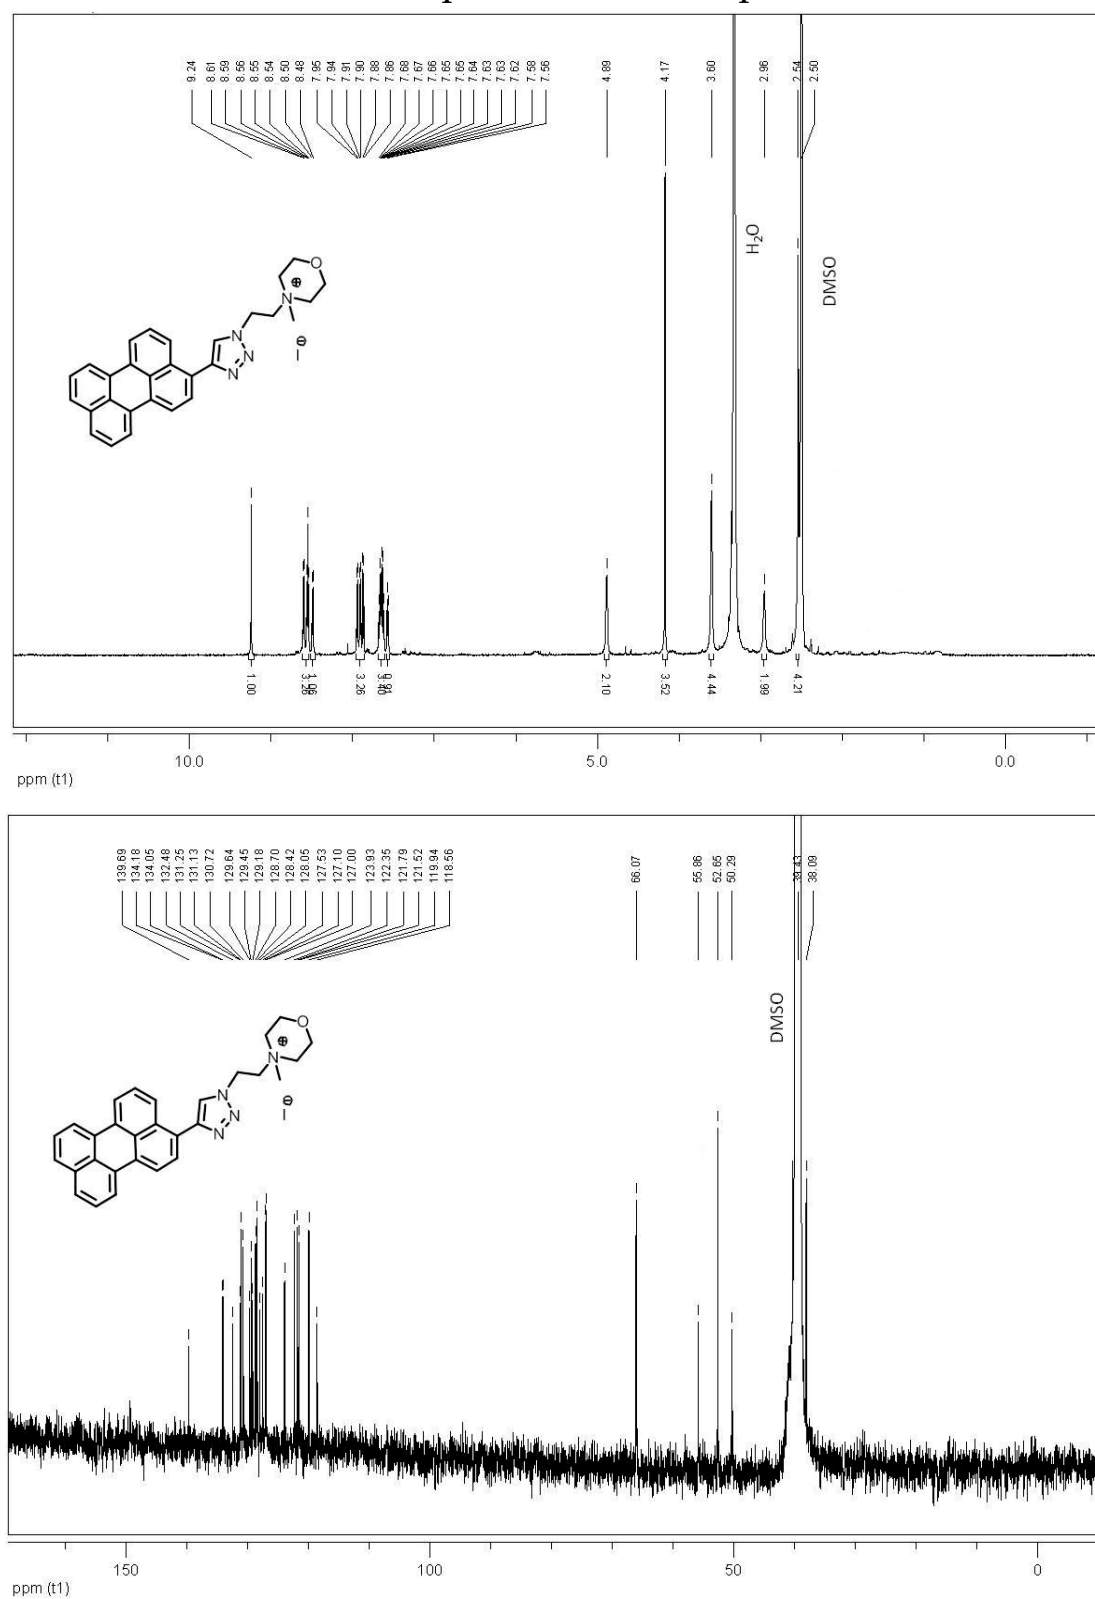

Figure S4.  $^1\text{H}$  and  $^{13}\text{C}$  NMR spectra of the compound **3b**.

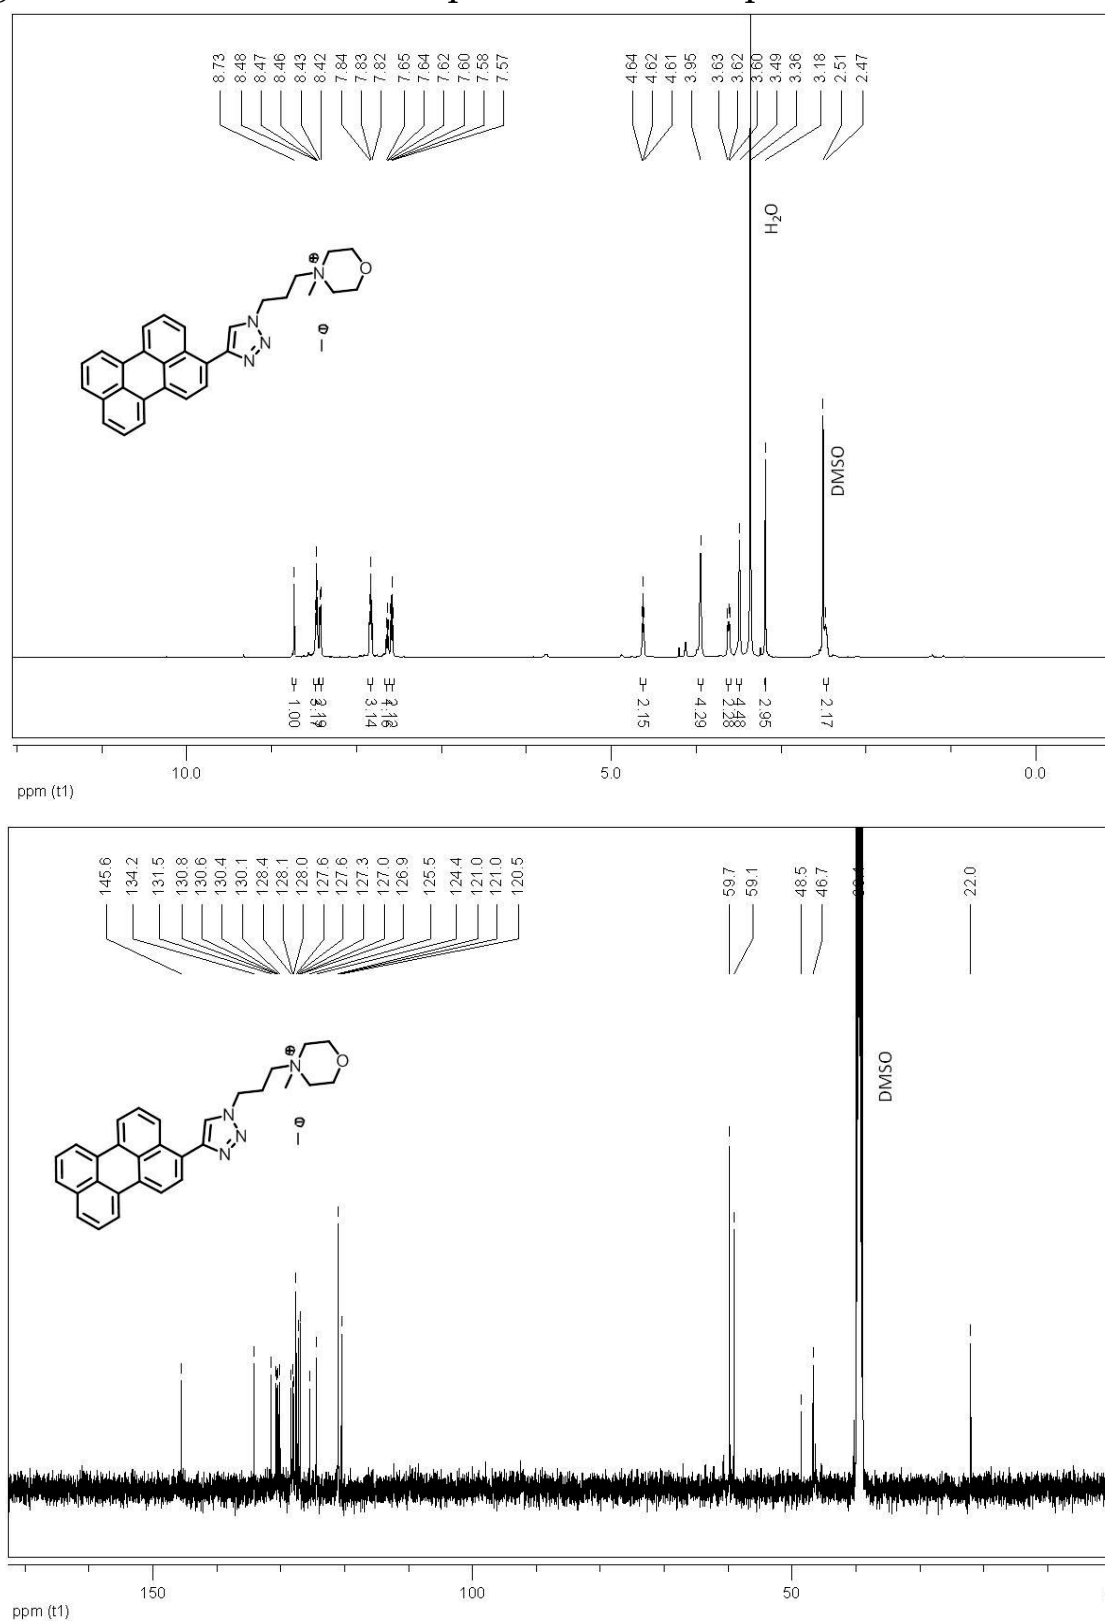

Figure S5.  $^1\text{H}$  and  $^{13}\text{C}$  NMR spectra of the compound 5.

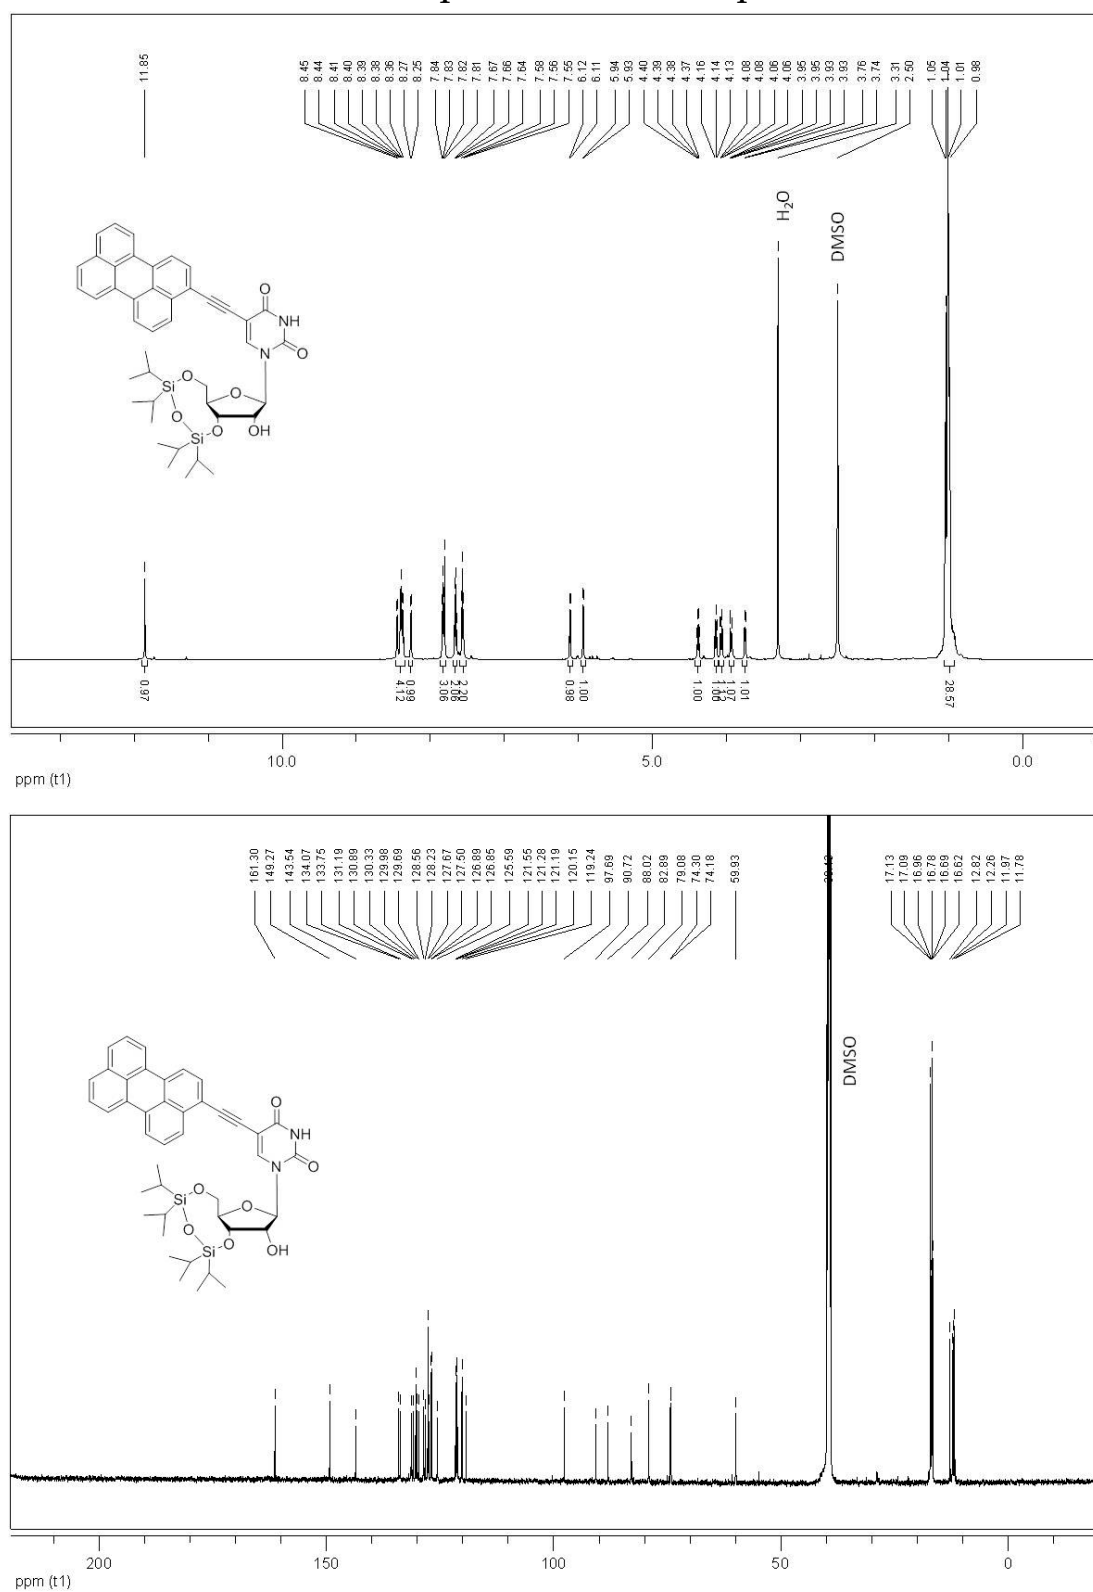

Figure S6.  $^1\text{H}$  and  $^{13}\text{C}$  NMR spectra of the compound 6.

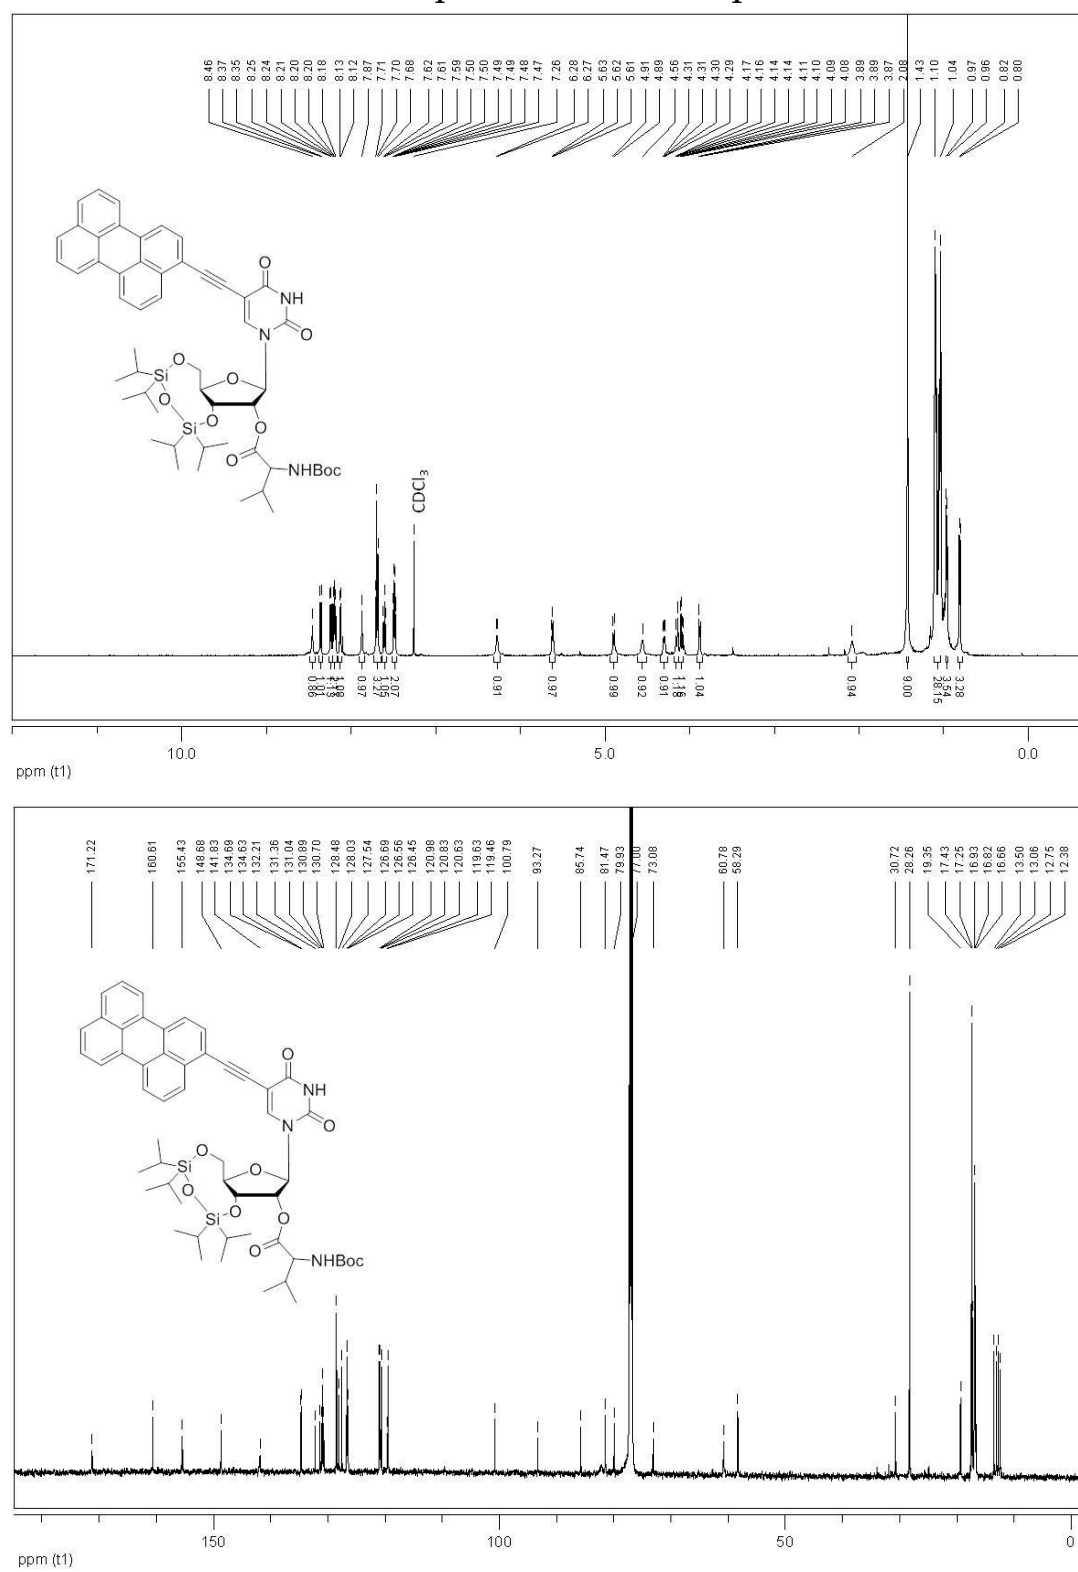



Figure S7.  $^1\text{H}$  and  $^{13}\text{C}$  NMR spectra of the compound 7.

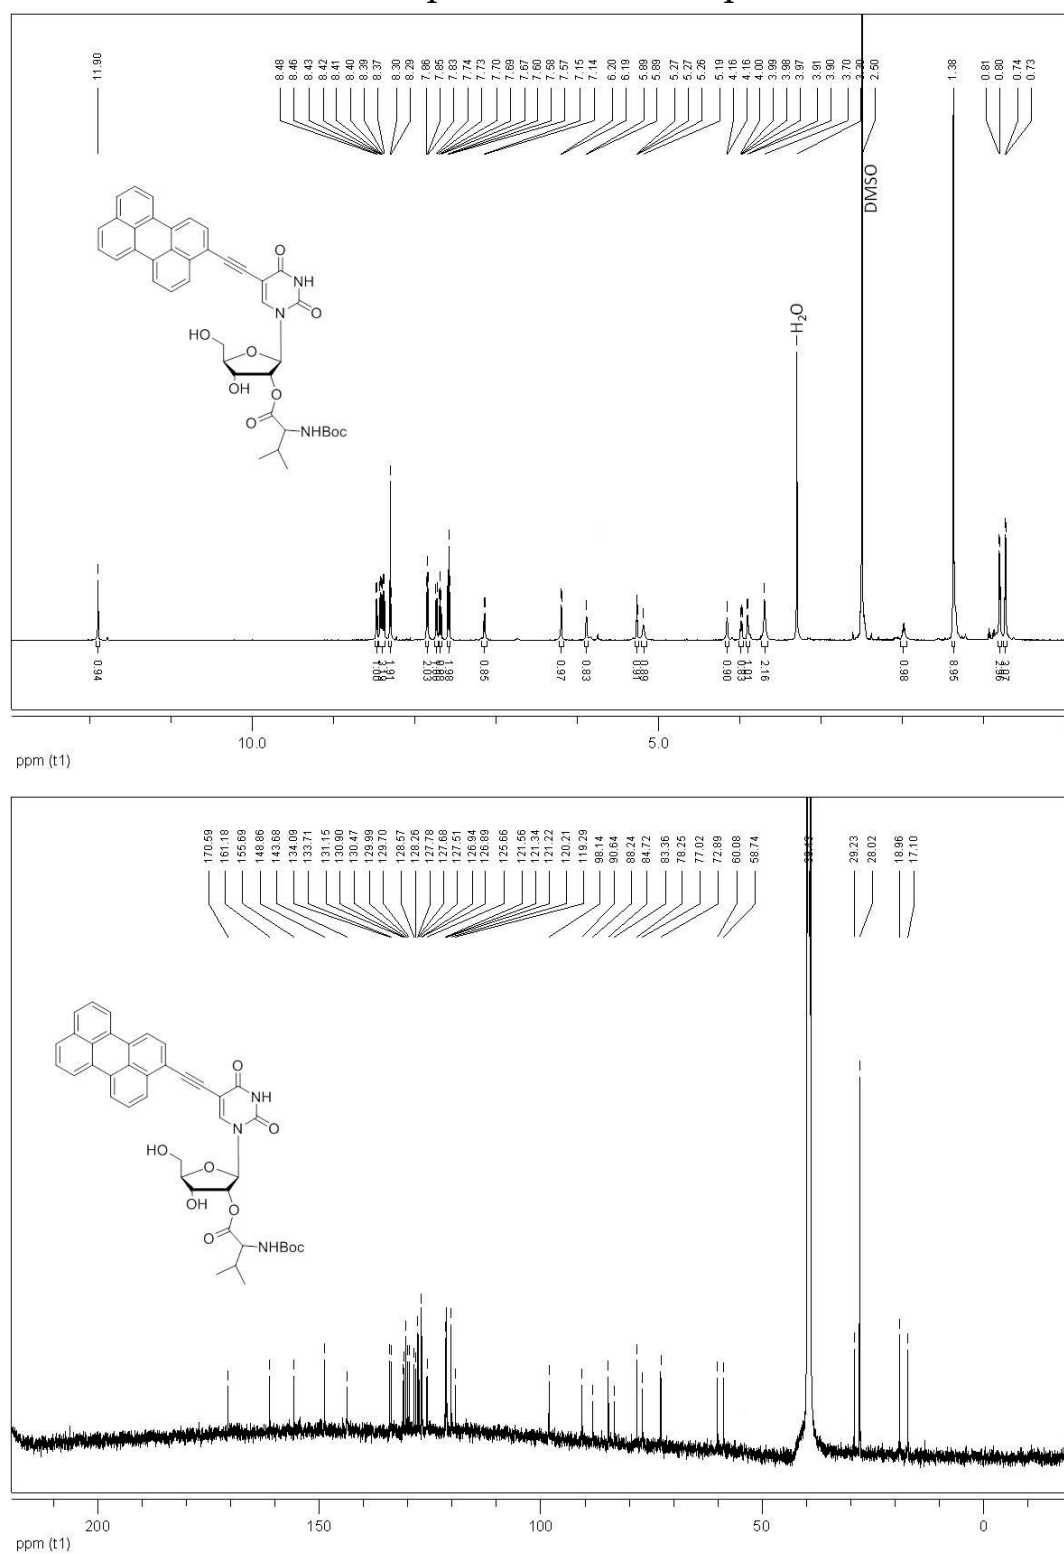

Figure S8.  $^1\text{H}$  and  $^{13}\text{C}$  NMR spectra of the compound **8**.

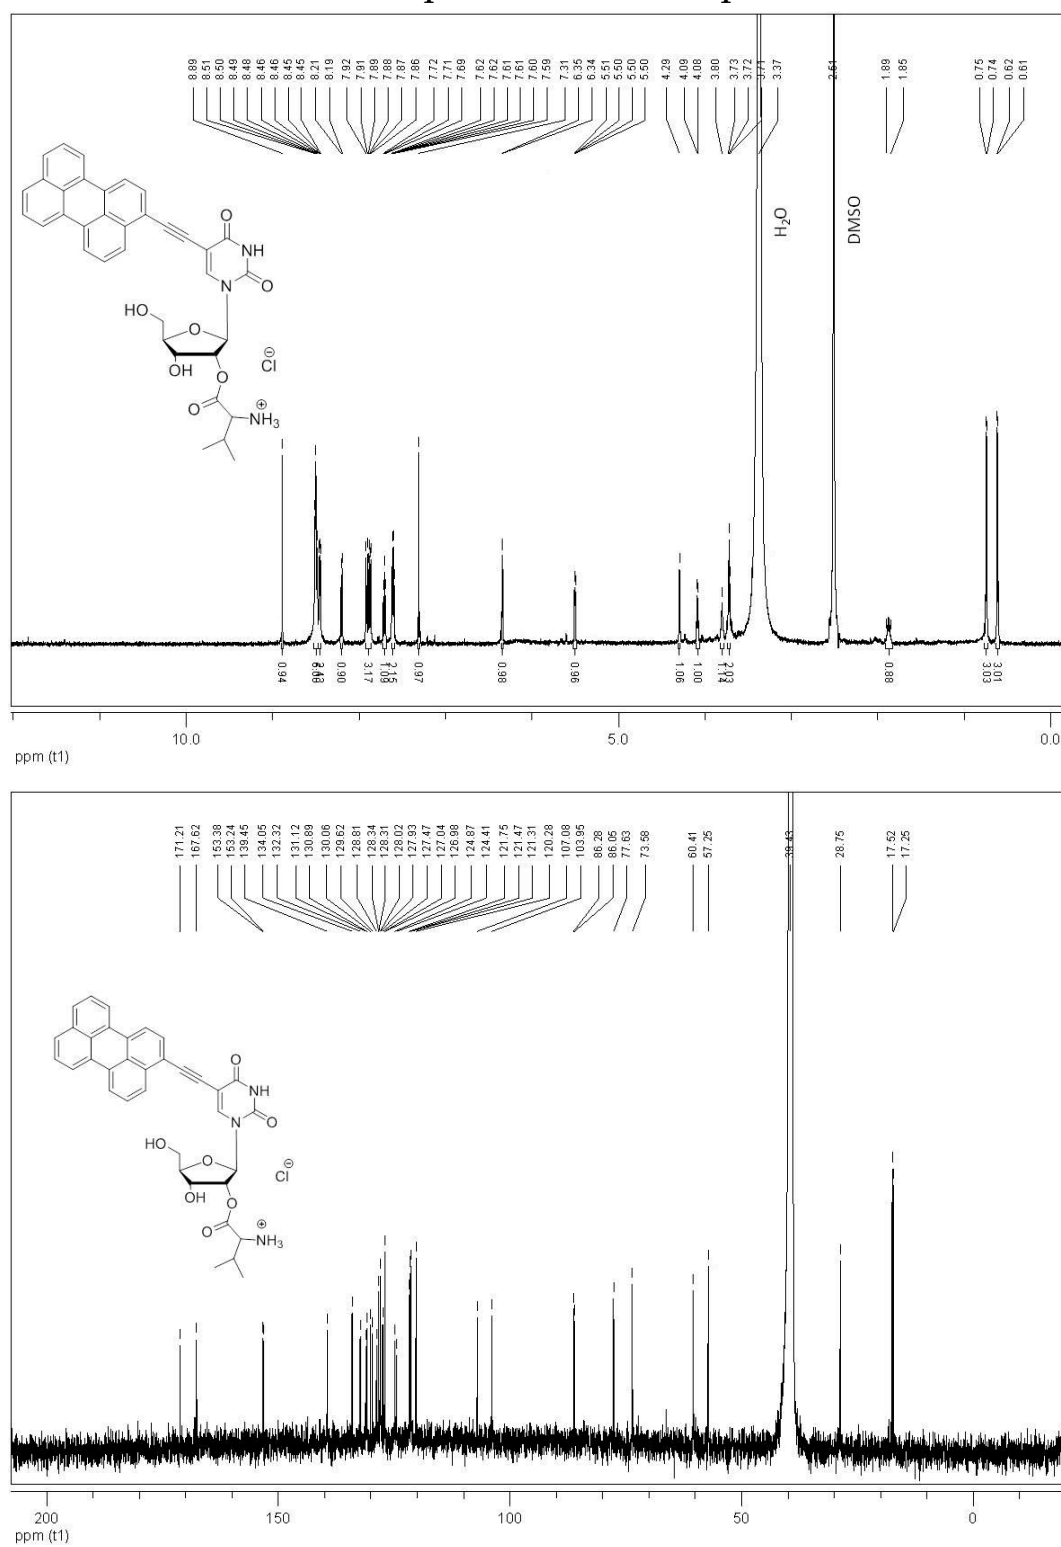

Figure S9.  $^1\text{H}$  and  $^{13}\text{C}$  NMR spectra of the compound **10**.

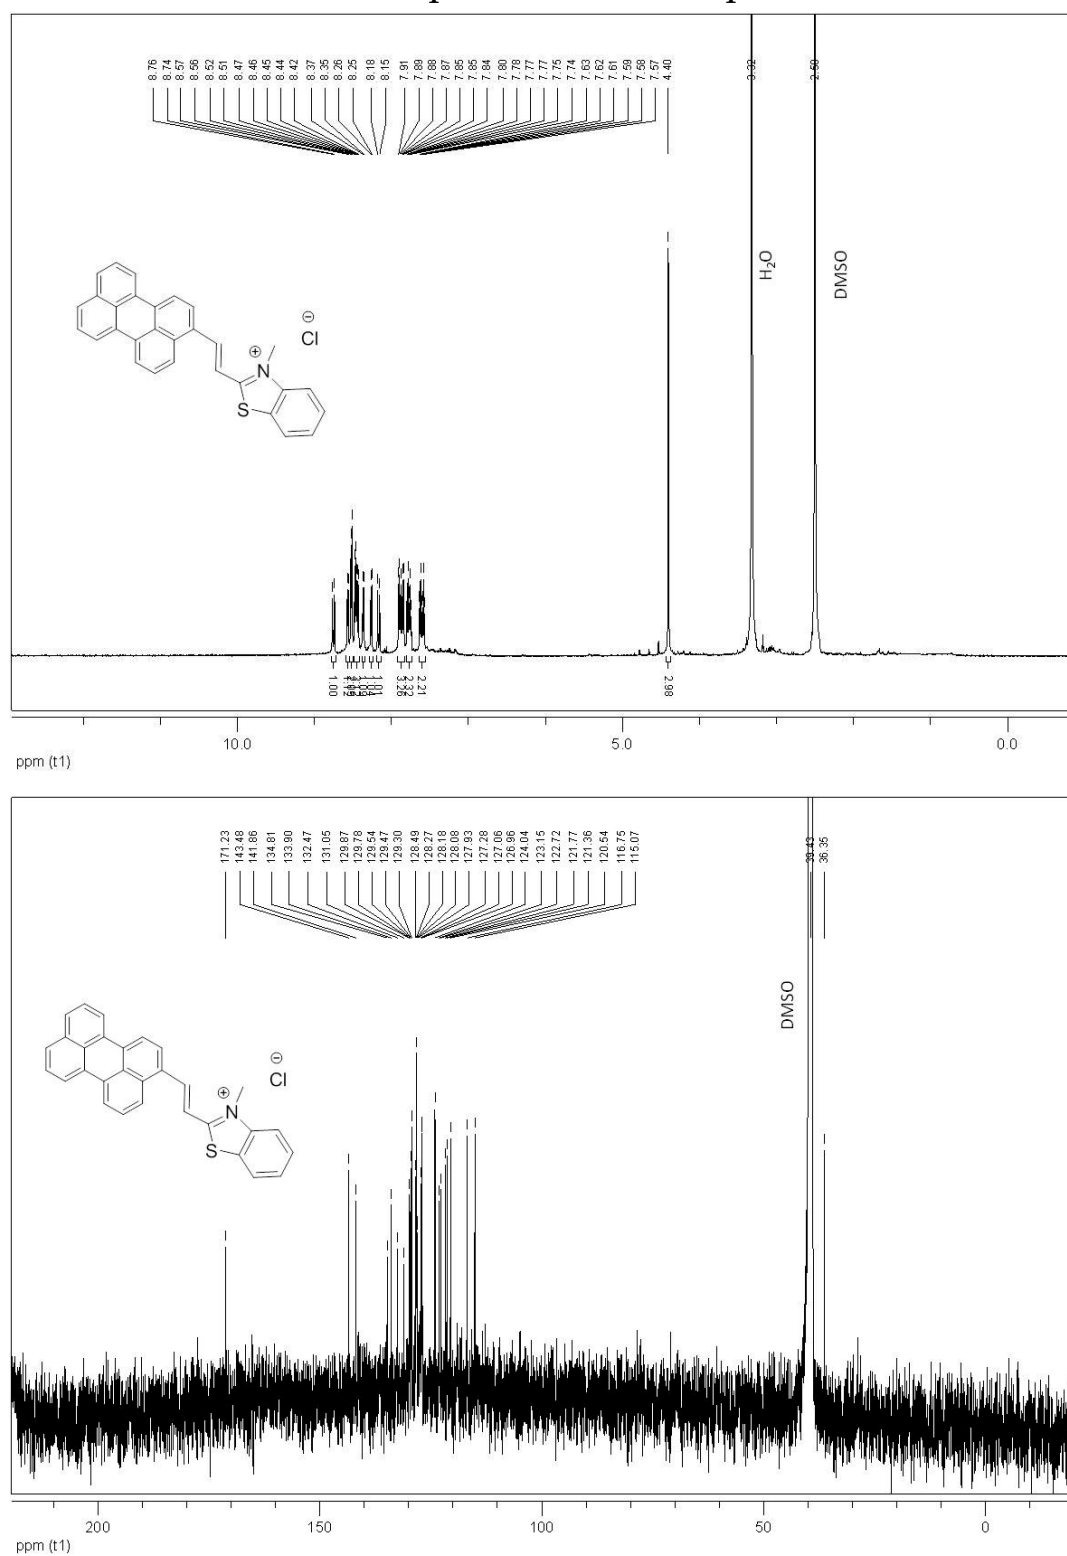

**Table S1.** Predicted ADMET profiles of the synthesized compounds

| compound | Structure                                                                           | cHIA <sup>a</sup> | clogBB <sup>b</sup> |
|----------|-------------------------------------------------------------------------------------|-------------------|---------------------|
| 2a       | 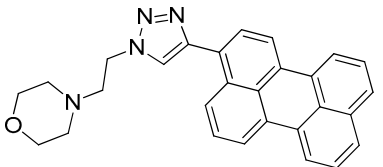   | 85.4              | 0.17                |
| 2b       |   | 99.97             | 0.25                |
| 3a       |    | 10.06             | 0.04                |
| 3b       |   | 10.06             | 0.13                |
| 5        |  | 83.25             | -0.67               |

|    |                                                                                     |       |      |
|----|-------------------------------------------------------------------------------------|-------|------|
| 6  | 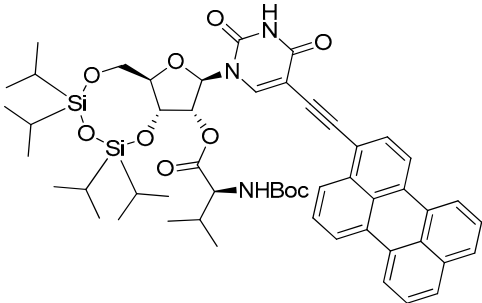  | 73.26 | 0.03 |
| 7  |    | 42.53 | 0.53 |
| 8  |   | 42.53 | -0.6 |
| 10 |  | 97.22 | 0.01 |

<sup>a</sup> HIA – human intestinal absorption [%],

<sup>b</sup> LogBB – blood-brain barrier permeability.

[Back to Contents](#)

Figure S10. Serum stability evaluation

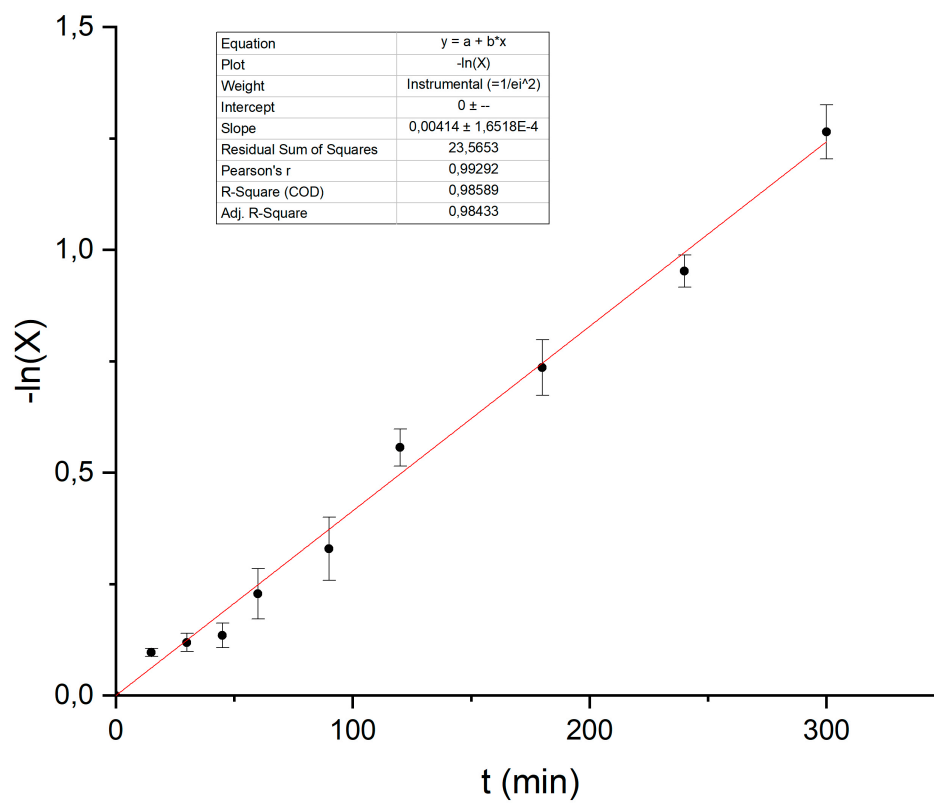

## Figure S11. HPLC trace for compound **3a**

Data File C:\Users\Public\Documents\ChemStation\1\Data\Seq1 2022-09-09 22-13-29\005-P2-A8-545.D  
Sample Name: 545

```
=====
Acq. Operator   : SYSTEM                      Seq. Line :    5
Sample Operator : SYSTEM
Acq. Instrument : LCMS                      Location  : P2-A-08
Injection Date  : 9/9/2022 11:38:16 PM      Inj       :    1
                                           Inj Volume: 2.000 µl
Different Inj Volume from Sample Entry! Actual Inj Volume : 5.000 µl
Acq. Method     : C:\Users\Public\Documents\ChemStation\1\Data\Seq1 2022-09-09 22-13-29
                  \Purity_test450_SEQ.M
Last changed    : 9/9/2022 10:13:26 PM by SYSTEM
Analysis Method : C:\Users\Public\Documents\ChemStation\1\Data\Seq1 2022-09-09 22-13-29
                  \Purity_test450_SEQ.M (Sequence Method)
Last changed    : 9/13/2022 3:37:42 PM by SYSTEM
                  (modified after loading)
Additional Info  : Peak(s) manually integrated
```

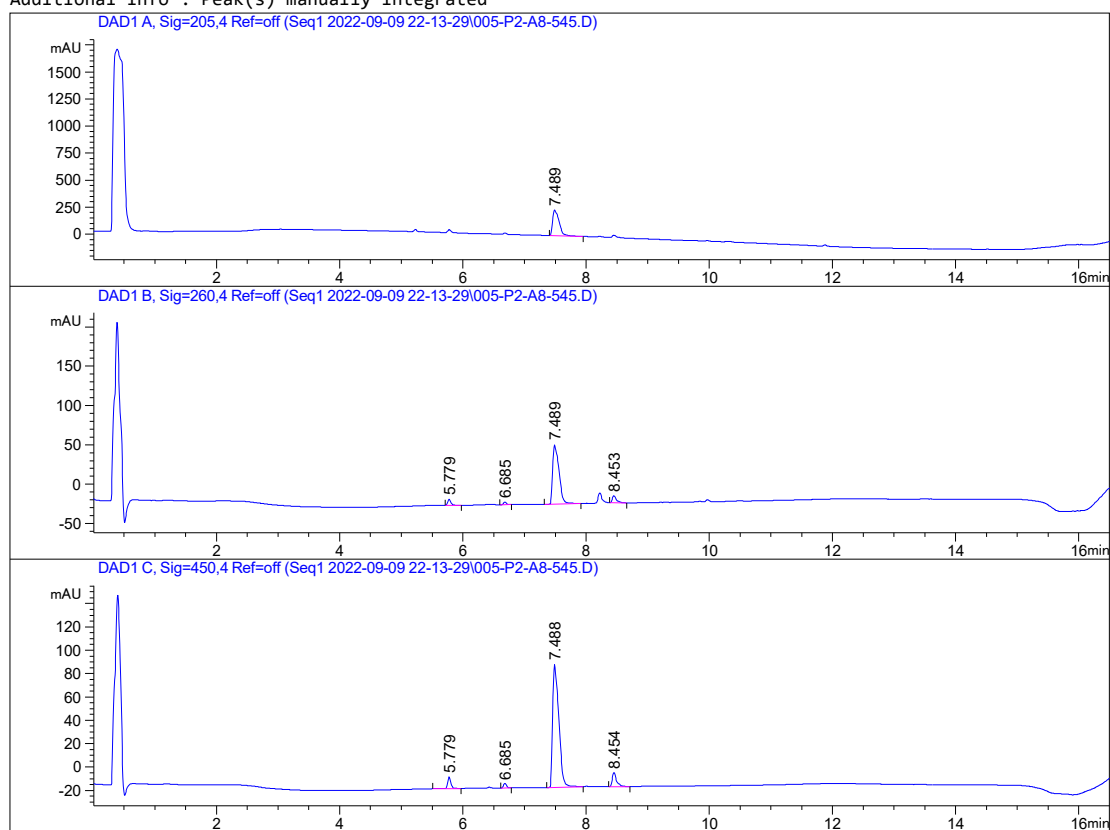

## Figure S12. HPLC trace for compound **3b**

Data File C:\Users\P...\ChemStation\1\Data\Seq1 2022-09-13 16-06-50\007-P1-A3-ARVI-20-16.D  
Sample Name: ARVI-20-16

```
=====
Acq. Operator   : SYSTEM                      Seq. Line :    7
Sample Operator : SYSTEM
Acq. Instrument : LCMS                      Location  : P1-A-03
Injection Date  : 9/13/2022 5:59:42 PM      Inj       :    1
                                           Inj Volume: 2.000 µl
Different Inj Volume from Sample Entry! Actual Inj Volume : 20.000 µl
Acq. Method     : C:\Users\Public\Documents\ChemStation\1\Data\Seq1 2022-09-13 16-06-50
                  \Purity_test450_SEQ.M
Last changed    : 9/9/2022 10:13:26 PM by SYSTEM
Analysis Method : C:\Users\Public\Documents\ChemStation\1\Data\Seq1 2022-09-13 16-06-50
                  \Purity_test450_SEQ.M (Sequence Method)
Last changed    : 9/13/2022 6:37:22 PM by SYSTEM
                  (modified after loading)
Additional Info  : Peak(s) manually integrated
```

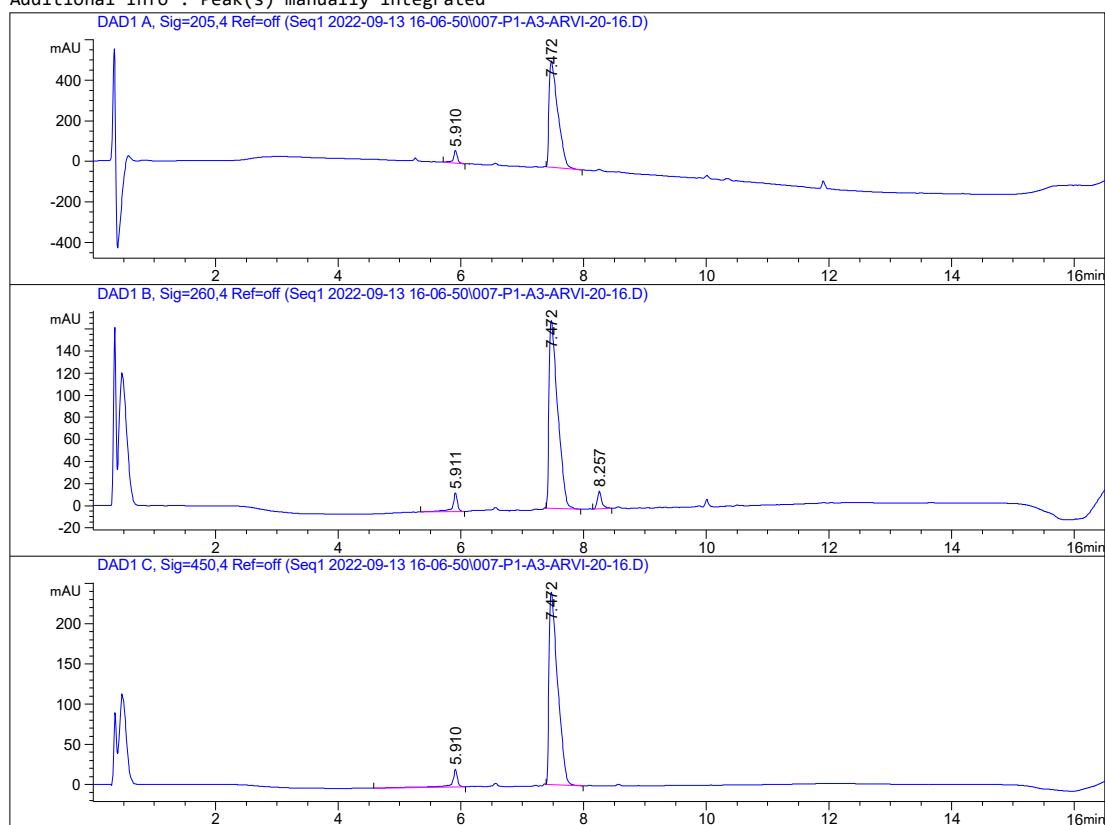



## Figure S13. HPLC trace for compound 8

Data File C:\Users\Public\Documents\ChemStation\1\Data\Seq1 2022-09-13 16-06-50\009-P1-A4-AR554.D  
Sample Name: AR554

```
=====
Acq. Operator   : SYSTEM                      Seq. Line :    9
Sample Operator : SYSTEM
Acq. Instrument : LCMS                      Location  : P1-A-04
Injection Date  : 9/13/2022 6:35:09 PM      Inj       :    1
                                           Inj Volume: 2.000 µl
Different Inj Volume from Sample Entry! Actual Inj Volume : 10.000 µl
Acq. Method     : C:\Users\Public\Documents\ChemStation\1\Data\Seq1 2022-09-13 16-06-50
                  \Purity_test450_SEQ.M
Last changed    : 9/9/2022 10:13:26 PM by SYSTEM
Analysis Method : C:\Users\Public\Documents\ChemStation\1\Data\Seq1 2022-09-13 16-06-50
                  \Purity_test450_SEQ.M (Sequence Method)
Last changed    : 9/13/2022 6:53:31 PM by SYSTEM
                  (modified after loading)
Additional Info  : Peak(s) manually integrated
```

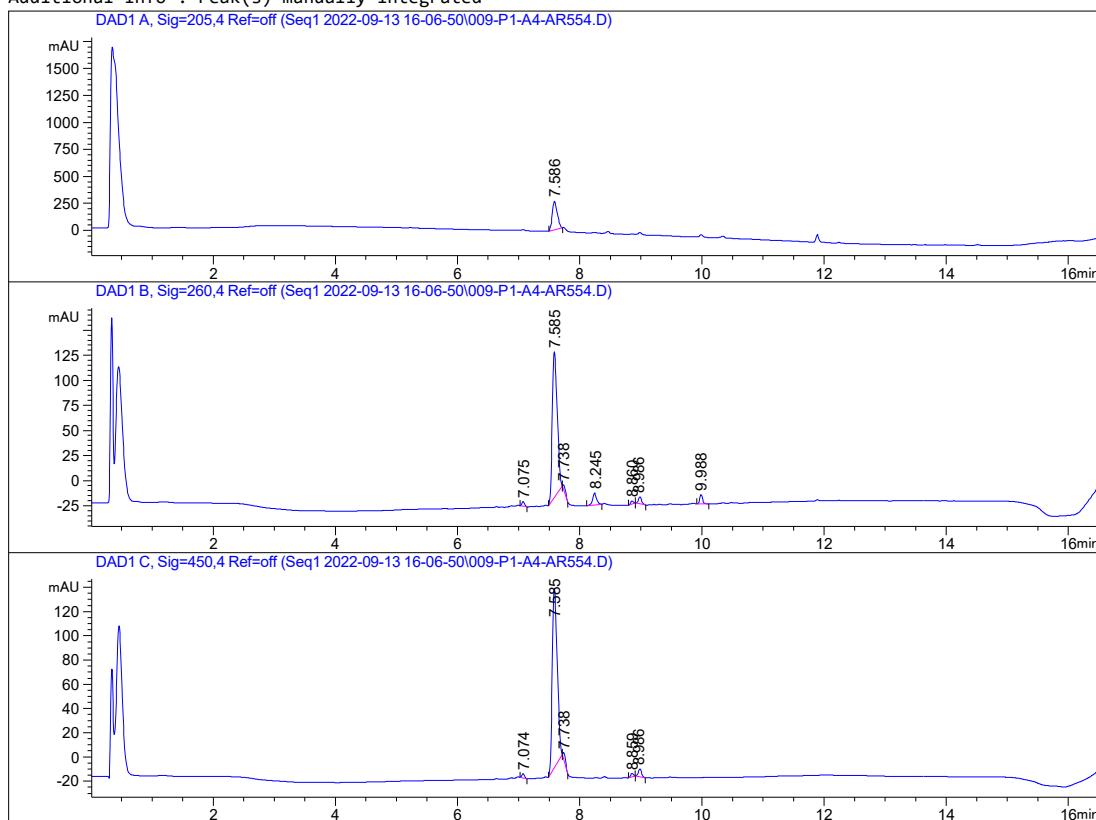

## Figure S14. HPLC trace for compound 10

Data File C:\Users\Public\Documents\ChemStation\1\Data\Seq1 2022-09-13 16-06-50\005-P2-A5-AR542.D  
Sample Name: AR542

```
=====
Acq. Operator   : SYSTEM                      Seq. Line :    5
Sample Operator : SYSTEM
Acq. Instrument : LCMS                      Location  : P2-A-05
Injection Date  : 9/13/2022 5:22:10 PM      Inj       :    1
                                           Inj Volume: 2.000 µl
Different Inj Volume from Sample Entry! Actual Inj Volume : 5.000 µl
Acq. Method     : C:\Users\Public\Documents\ChemStation\1\Data\Seq1 2022-09-13 16-06-50
                                           \Purity_test530_SEQ.M
Last changed    : 9/9/2022 10:05:11 PM by SYSTEM
Analysis Method : C:\Users\Public\Documents\ChemStation\1\Data\Seq1 2022-09-13 16-06-50
                                           \Purity_test530_SEQ.M (Sequence Method)
Last changed    : 9/13/2022 5:44:50 PM by SYSTEM
                                           (modified after loading)
Additional Info : Peak(s) manually integrated
```

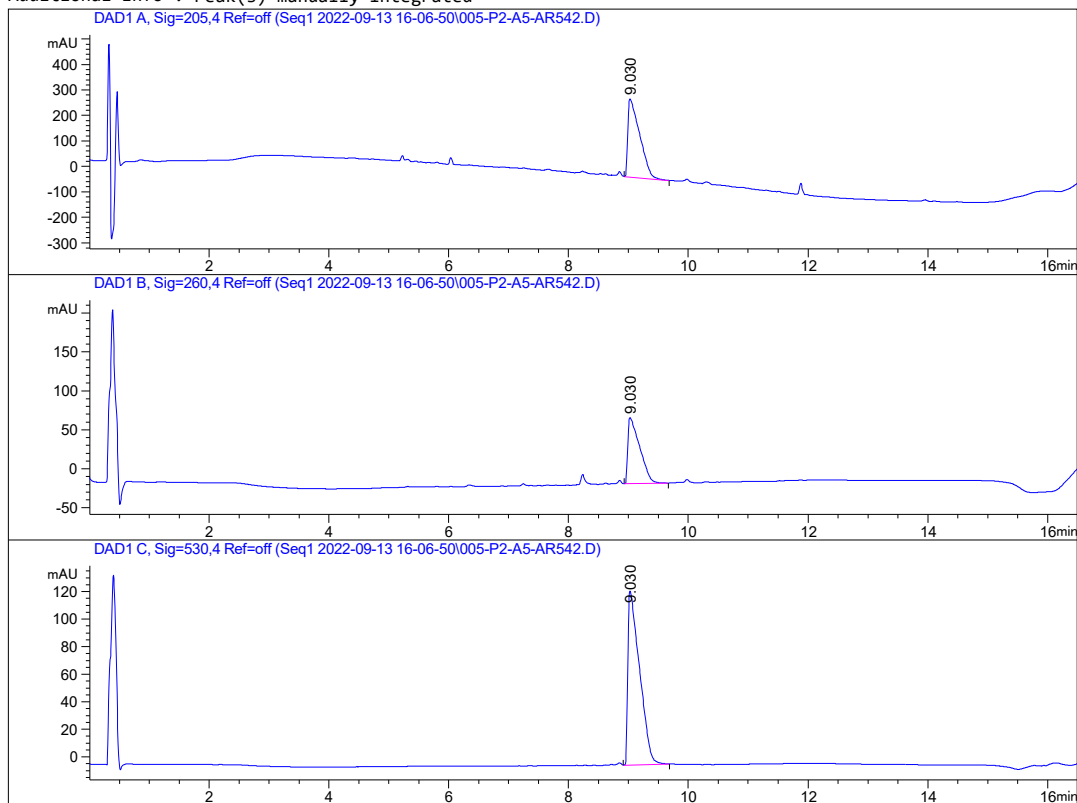

Supplement: s1 [file s1]
